# Supplementary material
Source: PubMed Central journal article supplement (PMC7836490)
Supplement: 00718-2020.questionnaire.pdf [file 00718-2020.questionnaire.pdf]

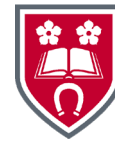

## COPD in the time of COVID-19 Study

### Questionnaire Script

Introduction and consent.

Once consent provided:

#### Section A

1. Have you had any periods of worsening of your breathing symptoms since the 1<sup>st</sup> of March this year?  
  
If No – go to section B.  
  
If Yes – go to question 2.
2. Have you had to use additional medication for these episodes? If yes, what was this medication?
  - a. Salbutamol (blue) inhaler?
  - b. Steroids? If so how many five day courses and on what dates?
  - c. Antibiotics? If so how many courses and on what dates?
3. Have you attended hospital for any of these episodes?  
  
In No – go to section B.  
  
If Yes – go to question 5.
4. If it weren't for COVID do you think you have gone to hospital?
5. Were you diagnosed with an Exacerbation of COPD?
6. Were you diagnosed with COVID-19? (if no – were you tested for COVID-19?)

#### Section B

About your COPD:

1. MRC Dyspnoea Scale (1 – 5)
2. Current Smoking Status (Never/Current/Ex)
3. If current or ex-smoker: Estimate pack years
4. How many times did your COPD symptoms worsen in the past 12 months sufficiently that you needed extra treatment (steroids or antibiotics) at home or at hospital? (Never / Once / Two or more times)

#### Section C

This section asks about your behaviour and circumstances over two separate periods of time which we will call the “pre-lockdown” from the 1<sup>st</sup> March 2020 to 14<sup>th</sup> March 2020 and the “lockdown” from the 15<sup>th</sup> March 2020 to the 30<sup>th</sup> April 2020. All questions need two answers, one relating to the pre-lockdown and one to the lockdown periods.

1. During the pre-lockdown and lockdown periods did you?
  - a. Normal behaviour



- b. Shielding (Not leaving your home or interacting face to face with anyone who does not live with in your home)
  - c. Social Distancing (Avoiding close contact (2 meters/8 feet) with anyone who does not live in your home)
2. During the pre-lockdown and lockdown periods who was living in your household?
  - a. Lived alone
  - b. Lived with a partner/spouse
  - c. Lived with working age children
  - d. Lived with (pre)school age children
  - e. Lived in an institutionalised setting (care home/ nursing home)
3. During the pre-lockdown and lockdown periods did you have any visitors to your home? Y/N  
If Yes were they:
  - a. Adults
  - b. (Pre)school age Children
4. During the pre-lockdown and lockdown periods how did you obtain essential items and groceries?
  - a. Self
  - b. Another person who lives in your home
  - c. Deliveries/ someone who does not live in your home
5. During the pre-lockdown and lockdown periods did you start any new medications? Y/N If yes, please list these.
6. During the pre-lockdown and lockdown periods did you use your regular (non-salbutamol) inhalers more or less regularly? (less)1 – 2 – 3 – 4 – 5 (more)
7. During the pre-lockdown and lockdown periods did you participate in a home exercise program? Y/N
8. During the pre-lockdown and lockdown periods were you more or less active than normal? (less)1 – 2 – 3 – 4 – 5 (more)
9. During the pre-lockdown and lockdown periods did you feel more or less anxious about your COPD? (less)1 – 2 – 3 – 4 – 5 (more)
10. During the pre-lockdown and lockdown periods did you avoid coming to hospital as an emergency due to fear of COVID 19? Y/N
